# Supplementary material
Source: PubMed Central journal article supplement (PMC539758)

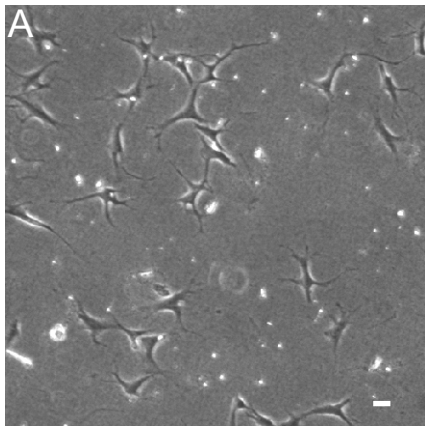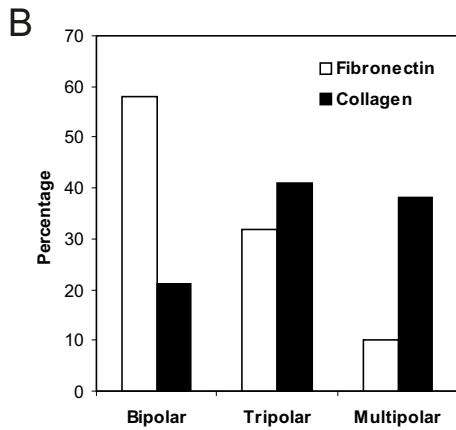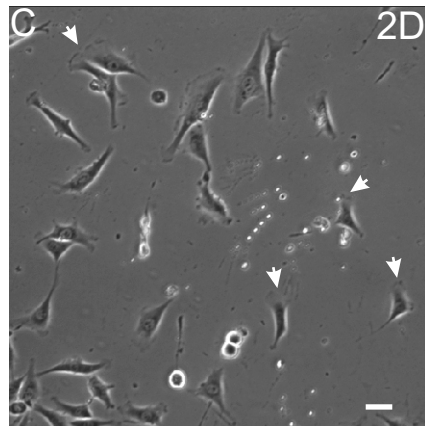

Supplement: pnas_101_52_18024__1.pdf [file pnas_101_52_18024__1.pdf]

A

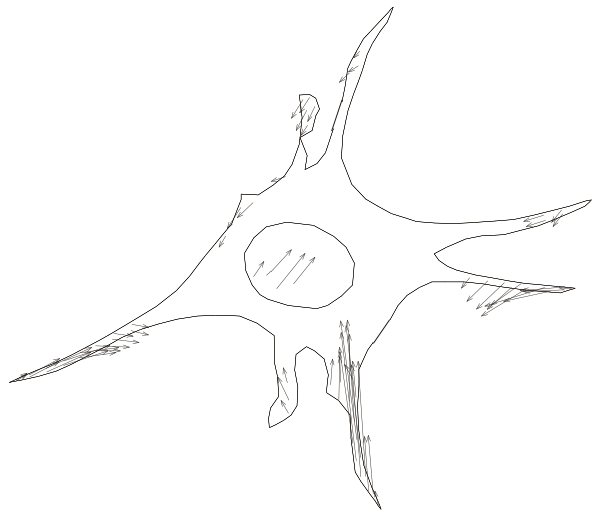

→ 1.00E+05 [DYN/CMSQ]

B

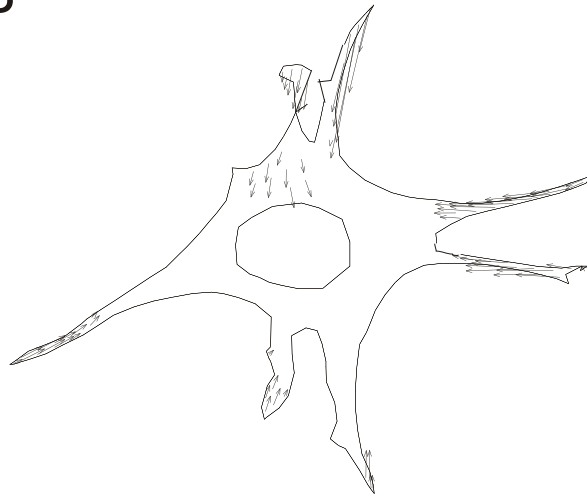

— 1.35E-03 [CM]

Supplement: pnas_101_52_18024__2.pdf [file pnas_101_52_18024__2.pdf]

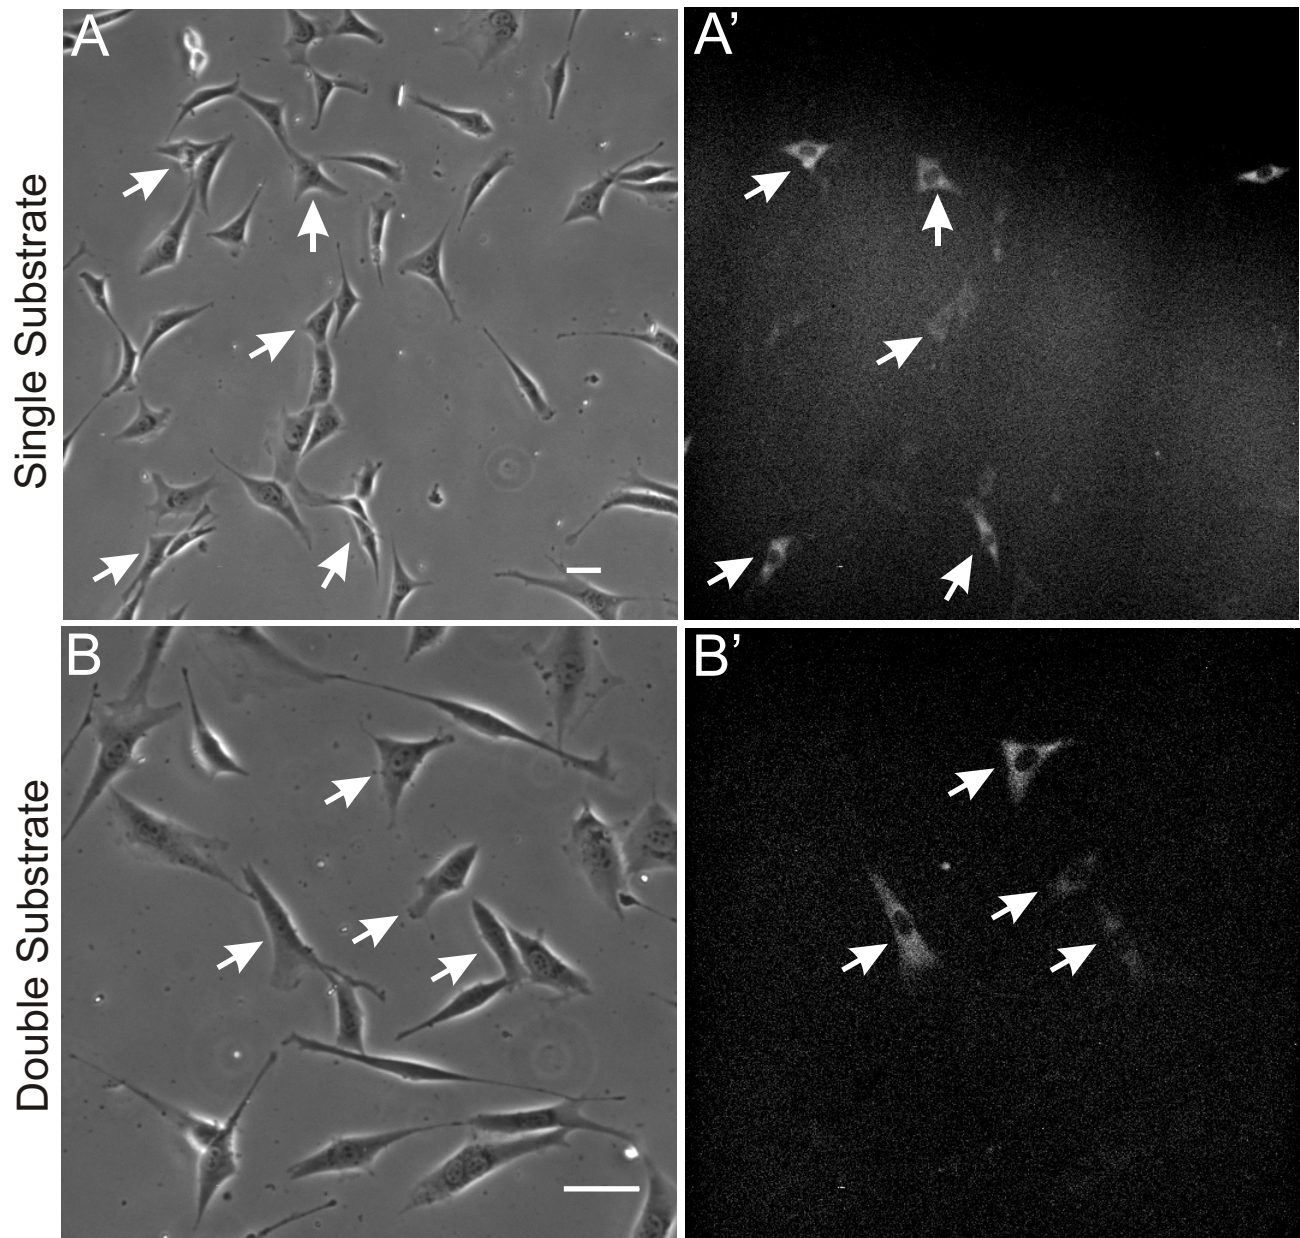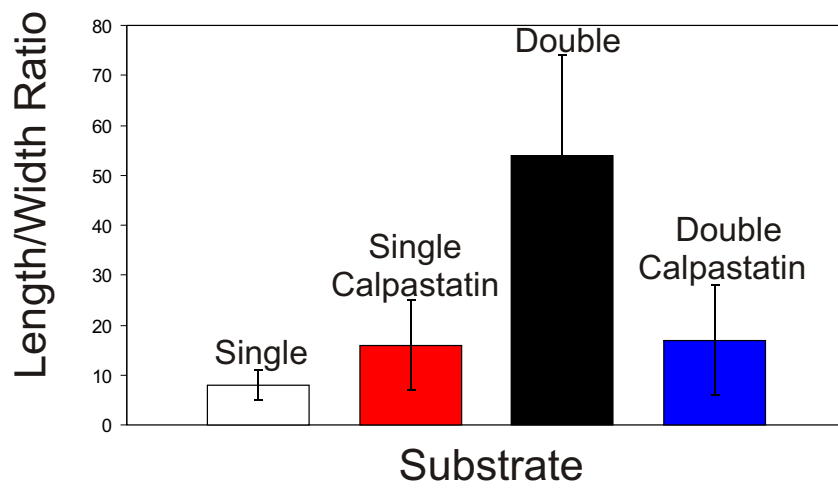

Supplement: pnas_101_52_18024__3.pdf [file pnas_101_52_18024__3.pdf]
